# Supplementary material
Source: PubMed Central journal article supplement (PMC3077829)
Supplement: NIHMS256250-supplement-1_si_001.pdf [file NIHMS256250-supplement-1_si_001.pdf]

## Supplemental Information

### A Re-wired Green Fluorescent Protein: Folding and Function in a Non-sequential, Non-circular GFP Permutant

Philippa J. Reeder<sup>1</sup>, Yao-Ming Huang<sup>2</sup>, Jonathan S. Dordick<sup>2,3\*</sup>, and Christopher Bystroff<sup>2\*</sup>,

<sup>1</sup>Department of Chemical and Biological Engineering, University of Colorado, Boulder, 80309, <sup>2</sup>Department of Biology and <sup>3</sup>Department of Chemical and Biological Engineering, Rensselaer Polytechnic Institute, Troy, NY 12180

\*To whom correspondence should be addressed (bystrc@rpi.edu; dordick@rpi.edu)

**Table 1S. Sequences of constructs.** New loops are highlighted with bold text.

#### GFP-OPT

MGSSHHHHHHSSGLVPRGSHM

KGEELFTGVVPILEVELDGDVNGHKFSVRGEGEGDATIGKLTCLKFICTTGKLPVPWPTLVTLTYGVQCFSRYPDHMKRHDFFKSAMPEGYVQERTISFKDDGKYKTRATVKFVGDTLVNR IELKGTDFKEDGNILGHKLEYNFNSHNVIITADKQKNGIKANFTVRHNVEDGQSVQLADHY QQNTPIGDGPVLLPDNHYLSTQTVLSKDPNEKRDHMLLEFVTAAGITHGMDELYK

#### rGFP1

MGSSHHHHHHSSGLVPRGSIHM

GHKLEYNFNSHNVIITADKQKNGIKANFTVRHNIEDGQSVQLADHYQQNT**FEGDTLV**QERTISFKDDGKYKTRAVVKFEGDTLVNRIELKGTDFKEDGN**IMPGDGP**WPTLVTTLYGVQCFSRYPDHMKRHDFFKSA**EKG**VLLPDNHYLSTQTVLSKDPNEKRDHMLLEFVTAAGITHGMDELYK**GGTGG**SMASKGEELFTGVVPILEVELDGDVNGHKFSVRGEGEGDATIGKLTCLKFICTTGKL

#### rGFP2

MGSSHHHHHHSSGLVPRGSIHM

GGASGSKGEELFTGVVPILEVELDGDVNGHKFSVSGEEGEGDATYKLTCLKFICTTGKLPVPWPTLVTTLYGVQCFSRYPDHMKRHDFFKSAMPEGYVQERTISFKDDGNYKTRAEVKFEGDTLVNRIELKIDFKEDGNILGHKLEYNYNSHNVI**IDGG**VYLSTQSALSKDPNEKRDHMLLEFVTAAGIT**GGDGP**KLV**PDS**GIKANFKIRHNIEDGQSVQLADHYQQNTPIGDAGGS

#### rGFP3

MGSSHHHHHHSSGLVPRGSIHM

QKNGIKANFTVRHNIEDGSVQLADHYQQNTPIGDG**SGTGS**GKGEELFTGVVPILEVELDGD  
VNGHKFSVRGEGEGDATIGKLTLLKFICTTGKLPVPWPTLVTTTLTYGVQCFSRYPDHMKRH  
DFFKSAMPEGYVQERTISFKDDGKYKTRAVVKFEGDTLVNRIELKGTDFKEDGNILGHKL  
EYNFNHSHNVYITAD**GGSGGT**GVLLPDNHYLSTQTVLSKDPNEKRDHMLLEFVTAAGITH

**rGFP3 CP map.** CP name is indicated by the numbers in brackets. Crossed out sequences are removed in the CP construct closest to it.

MGSSHHHHHHSSGLVPRGSIHM

QKNGIKANFTVRHNI ~~ED~~ (9-8) GSVQLADHYQQNTPIGDG **SGTGS** (1-9)  
KGEELFTGVVPILEVELDGDVN (2-1) GHKFSVRGEGEGDAT (3-2)  
IGKLTLLKFICTTGK (A-3) LPVPWPTLVTTTLTYGVQCFSRYPDHMKRH  
DFFKSAM (4-A) ~~P~~ EGYVQERTISFKD (5-4) DGKYKTRAVVKFEGD (6-5)  
TLVNRIELKGTDFK (L-6) EDGNILGHKLE ~~Y~~ (7-L) NFNHSHNVYITAI  
~~DGGSGGT~~ (10-7) GVLLPDNHYLSTQTVLSKDPN (11-10)  
EKRDHMLLEFVTAAGITH **GGTGS**

*GGTGS is the loop introduced for circular permutation*

### **rGFP3 CP 9-8**

MGSSHHHHHHSSGLVPRGSIHM

GSVQLADHYQQNTPIGDGSGTGSKGGEELFTGVVPILEVELDGDVNGHKFSVRGEGEGDAT  
IGKLTLLKFICTTGKLPVPWPTLVTTTLTYGVQCFSRYPDHMKRHDFFKSAMPEGYVQERTI  
SFKDDGKYKTRAVVKFEGDTLVNRIELKGTDFKEDGNILGHKLEYNFNHSHNVYITAI  
DGGSGGTGVLLPDNHYLSTQTVLSKDPNEKRDHMLLEFVTAAGITH**GGTGS**QKNGIKANFTV  
RHNI

### **rGFP3 CP 1-9**

MGSSHHHHHHSSGLVPRGSIHM

KGEELFTGVVPILEVELDGDVNGHKFSVRGEGEGDATIGKLTLLKFICTTGKLPVPWPTLV  
TLTYGVQCFSRYPDHMKRHDFFKSAMPEGYVQERTISFKDDGKYKTRAVVKFEGDTLVN  
RIELKGTDFKEDGNILGHKLEYNFNHSHNVYITAI  
DGGSGGTGVLLPDNHYLSTQTVLSKDPNEKRDHMLLEFVTAAGITH**GGTGS**QKNGIKANFTVRHNI  
EDGSVQLADHYQQNTPIGDG

### **rGFP3 CP 2-1**

MGSSHHHHHHSSGLVPRGSIHM

GHKFSVRGEGEGDATIGKLTLLKFICTTGKLPVPWPTLVTTTLTYGVQCFSRYPDHMKRH  
DFFKSAMPEGYVQERTISFKDDGKYKTRAVVKFEGDTLVNRIELKGTDFKEDGNILGHKL  
EYNFNHSHNVYITAI  
DGGSGGTGVLLPDNHYLSTQTVLSKDPNEKRDHMLLEFVTAAGITH**GGTGS**QKNGIKANFTVRHNI  
EDGSVQLADHYQQNTPIGDGSGTGSKGGEELFTGVVPILEVELDGDVN

### **rGFP3 CP 3-2**

MGSSHHHHHHSSGLVPRGSIHM

IGKLTLLKFICTTGKLPVPWPTLVTTLLTYGVQCFSRYPDHMKRHDFFFKSAMPEGYVQERTI  
SFKDDGKYKTRAVVKFEGDTLVNRIELKGTDFKEDGNILGHKLEYNFNSHNVYITAIDGG  
SGGTGVLLPDNHYLSTQTVLSKDPNEKRDHMLLEFVTAAGITH**GGTGS**QKNGIKANFTV  
RHNIEDGSVQLADHYQQNTPIGDGSGTGSGKGEELFTGVVPILEVELDGDVNGHKFSVRGE  
GEGDAT

### **rGFP3 CP A-3**

MGSSHHHHHHSSGLVPRGSIHM

LPVPWPTLVTTLLTYGVQCFSRYPDHMKRHDFFFKSAMPEGYVQERTISFKDDGKYKTRAVV  
KFEGDTLVNRIELKGTDFKEDGNILGHKLEYNFNSHNVYITAIDGGSGGTGVLLPDNHYL  
STQTVLSKDPNEKRDHMLLEFVTAAGITH**GGTGS**QKNGIKANFTVRHNIEDGSVQLADH  
YQQNTPIGDGSGTGSGKGEELFTGVVPILEVELDGDVNGHKFSVRGEGEGDATIGKLTLLK  
FICTTGK

### **rGFP3 CP 4-A**

MGSSHHHHHHSSGLVPRGSIHM

EGYVQERTISFKDDGKYKTRAVVKFEGDTLVNRIELKGTDFKEDGNILGHKLEYNFNSHN  
VYITAIDGGSGGTGVLLPDNHYLSTQTVLSKDPNEKRDHMLLEFVTAAGITH**GGTGS**QK  
NGIKANFTVRHNIEDGSVQLADHYQQNTPIGDGSGTGSGKGEELFTGVVPILEVELDGDVN  
GHKFSVRGEGEGDATIGKLTLLKFICTTGKLPVPWPTLVTTLLTYGVQCFSRYPDHMKRHDF  
FKSAM

### **rGFP3 CP 5-4**

MGSSHHHHHHSSGLVPRGSIHM

DGKYKTRAVVKFEGDTLVNRIELKGTDFKEDGNILGHKLEYNFNSHNVYITAIDGGSGGT  
GVLLPDNHYLSTQTVLSKDPNEKRDHMLLEFVTAAGITH**GGTGS**QKNGIKANFTVRHNI  
EDGSVQLADHYQQNTPIGDGSGTGSGKGEELFTGVVPILEVELDGDVNGHKFSVRGEGEGD  
ATIGKLTLLKFICTTGKLPVPWPTLVTTLLTYGVQCFSRYPDHMKRHDFFFKSAMPEGYVQER  
TISFKD

### **rGFP3 CP 6-5**

MGSSHHHHHHSSGLVPRGSIHM

TLVNRIELKGTDFKEDGNILGHKLEYNFNSHNVYITAIDGGSGGTGVLLPDNHYLSTQTV  
LSKDPNEKRDHMLLEFVTAAGITH**GGTGS**QKNGIKANFTVRHNIEDGSVQLADHYQQNT  
PIGDGSGTGSGKGEELFTGVVPILEVELDGDVNGHKFSVRGEGEGDATIGKLTLLKFICTTG  
KLPVPWPTLVTTLLTYGVQCFSRYPDHMKRHDFFFKSAMPEGYVQERTISFKDDGKYKTRAV  
VKFEGD

### **rGFP3 CP L-6**

MGSSHHHHHHSSGLVPRGSIHM

EDGNILGHKLEYNFNSHNVYITAIDGGSGGTGVLLPDNHYLSTQTVLSKDPNEKRDHML  
LEFVTAAGITH**GGTGS**QKNGIKANFTVRHNIEDGSVQLADHYQQNTPIGDGSGTGSGKGE  
ELFTGVVPILEVELDGDVNGHKFSVRGEGEGDATIGKLTLLKFICTTGKLPVPWPTLVTTLL  
YGVQCFSRYPDHMKRHDFFFKSAMPEGYVQERTISFKDDGKYKTRAVVKFEGDTLVNRIEL

KGTFD

### **rGFP3 CP 7-L**

MGSSHHHHHHSSGLVPRGSIHM

NFNShNVYITAI DGGSGGTGVLLPDNHYLSTQTVLSKDPNEKRDHMLLEFVTAAGITH  
**GGTGS**QKNGIKANFTVRHNI EDGSVQLADHYQQNTPIGDGSGTGSGKGEELFTGVVPI LV  
ELDGDVNGHKFSVRGEGEGDATIGKLT LKFICTTGKLPVPWPTLVTTLT YGVQCFSRYPD  
HMKRHDFFKSAMPEGYVQERTISFKDDGKYKTRAVVKFEGDTLVNRIELKGTDFKEDGNI  
LGHKLE

### **rGFP3 CP 10-7**

MGSSHHHHHHSSGLVPRGSIHM

GVLLPDNHYLSTQTVLSKDPNEKRDHMLLEFVTAAGITH**GGTGS**QKNGIKANFTVRHNI  
EDGSVQLADHYQQNTPIGDGSGTGSGKGEELFTGVVPI LV EL DGDVNGHKFSVRGEGEGD  
ATIGKLT LKFICTTGKLPVPWPTLVTTLT YGVQCFSRYPDHMKRHDFFKSAMPEGYVQER  
TISFKDDGKYKTRAVVKFEGDTLVNRIELKGTDFKEDGNILGHKLEYNFNSHNVYITAI

### **rGFP3 CP 11-10**

MGSSHHHHHHSSGLVPRGSIHM

EKRDMVLEFVTAAGITHGGTGSQKNGIKANFTVRHNI EDGSVQLADHYQQNTPIGDG  
GTGSGKGEELFTGVVPI LV EL DGDVNGHKFSVRGEGEGDATIGKLT LKFICTTGKLPVP  
PTLVTTLT YGVQCFSRYPDHMKRHDFFKSAMPEGYVQERTISFKDGKYKTRAVVKFEGDT  
LVNRIELKGTDFKEDGNILGHKLEYNFNSHNVYITAI D**GGSGGT**GVLLPDNHYLSTQTVL  
SKDPN
